# Supplementary material for: Affinity-purified DNA-based mutation profiles of endometriosis-related ovarian neoplasms in Japanese patients
Source: PubMed Central journal article supplement (PMC5871076; doi:10.18632/oncotarget.24546), 2018-02-22
Supplement: oncotarget-09-14754-s001.pdf [file oncotarget-09-14754-s001.pdf]

## Affinity-purified DNA-based mutation profiles of endometriosis-related ovarian neoplasms in Japanese patients

### SUPPLEMENTARY MATERIALS

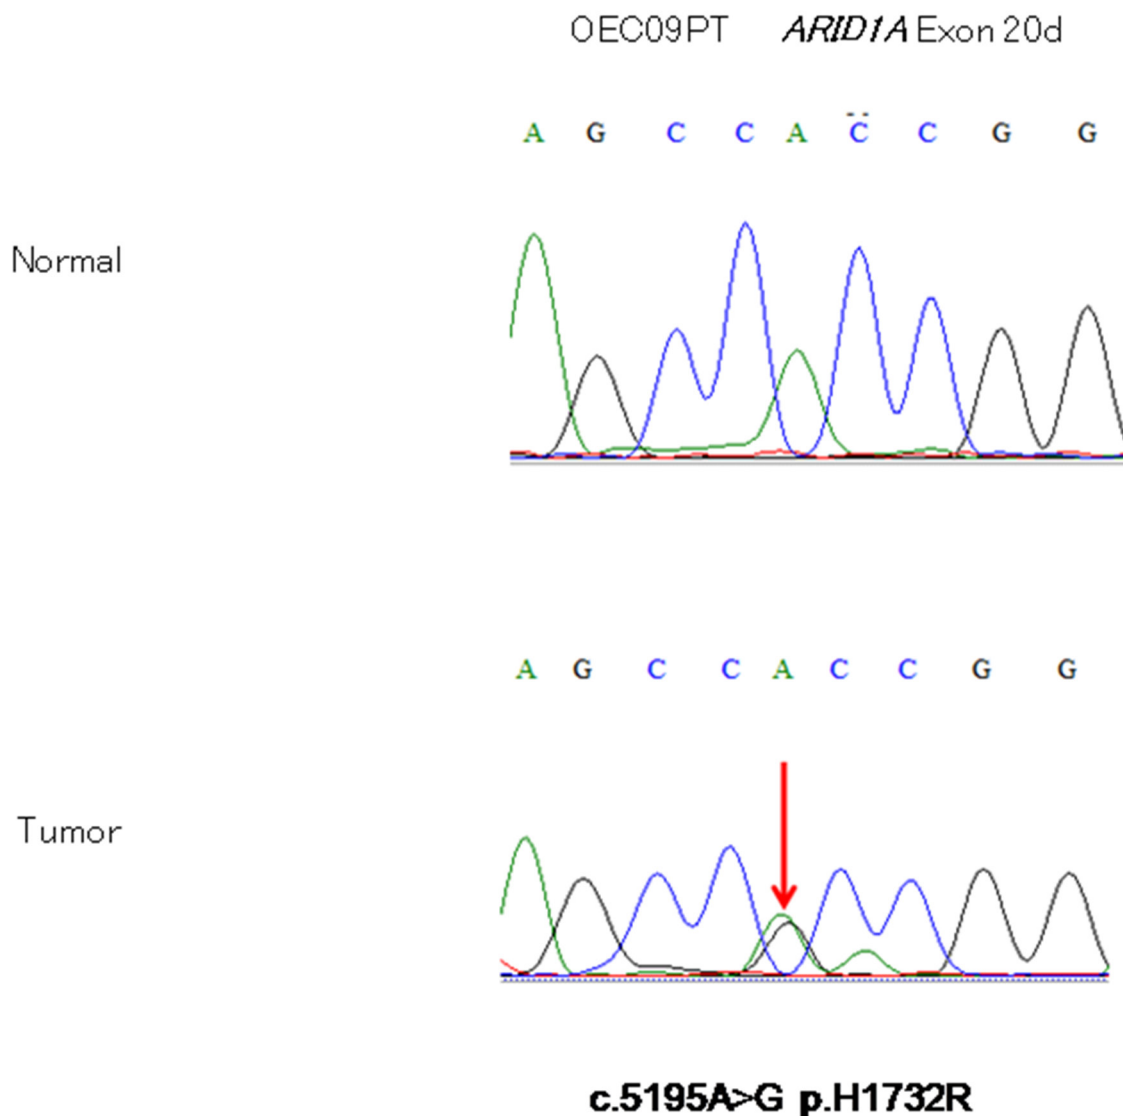

**Supplementary Figure 1: Mutations were confirmed by Sanger sequencing using DNA from tumor and normal tissues from the same patients.** There were no mutations in the same residues between tumor DNA and benign tissue DNA.

**Supplementary Table 1: Sequencing PCR primer details.**

See Supplementary File 1

**Supplementary Table 2: Mutations identified in the discovery screen.**

See Supplementary File 2
